# Supplementary material for: Genome-Scale Mapping of Escherichia coli σ54 Reveals Widespread, Conserved Intragenic Binding
Source: PLoS Genet. 2015 Oct 1;11(10):e1005552. doi: 10.1371/journal.pgen.1005552 (PMC4591121; doi:10.1371/journal.pgen.1005552)
Supplement: S2 Table — (XLSX) [file pgen.1005552.s008.xlsx]

## Sheet: Table S2
					Intragenic			Downstream
Classa	Peak Center	FATb	Motifc	Motif Strandd	b#e	Genee	Strandf	b#g	Geneg	Strandh	Ecocyci
OS	106511	4	CTGGCCCGCCGAATGTAT	+				b0096	lpxC	+
OS	257797	3	TTGGTAAAACAGTTGCAT	+				b0240	crl	+	C
OS	784715	4	CTGGCGTTTTTCTTGCTA	+				b0754	aroG	+
OS	1208878	3	ATGGCATCATTCCTGCTT	+				b1158	pinE	+	P
OS	1830314	3	ATGGCGCAAAAAATGCCC	-				b1748	astC	-
OS	2458981	3	CTGGCACCTTGGGTGCAC	-				b2343	yfcZ	-
OS	2796856	6	CTGGCATAAAAAATGCTG	+				b2670	alaE	+
OS	3646092	3	ATGGTATTAGCATTGATG	+				b3501	arsR	+
OS	3717471	3	CGGGATCGTGAATTGCAT	-				b3554	yiaF	-
OS	3939657	5	GCGGCGCGGGGTGTGCAT	-				b3755	yieP	-
OS	4170065	4	CTAGCCTCGTTTTTGCAT	+				b3972	murB	+
OS	4244590	4	TCGCCACGATTTTTGCAA	+				b4035	malK	+
OS	4404047	6	CTGGCAGATATTTTGCCT	+				b4178	nsrR	+
OA	542310	4	CCGGCATGAGTACTGCAC	-				b0514	glxK	+
OA	555783	3	TTGGCATGATGGTCGCTT	+				b0528	ybcJ	-
OA	982226	3	CTGGCGCACAAGAGGCAC	-				b0925	ycbB	+
OA	1877402	5	ATGGCGCAGAAATTGCGC	+				b1796	yoaG	-
OA	2008595	4	TTGGTGTTATTTTTGCAA	-				b1931	yedK	+
OA	2034812	3	GTGGCTGCGTTTTTTCAC	+				b1968	yedV	-
OA	4328451	5	GGGGAGCGGGAATTGCAG	-				b4110	yjcZ	+
IS	19024	3	TTGGCGTGGCTGATGCAC	+	b0020	nhaR	+	b0021	insB	-
IS	150262	3	CTGGTACAAAAGTTGTAG	-	b0135	yadC	-	b0134	panB	-
IS	201720	3	GTGGCGTCATTATGGCGG	+	b0179	lpxD	+	b0180	fabZ	+
IS	235111	4	CTGGCACATACATTGCCG	+	b0213	yafS	+	b0214	rnhA	-
IS	269008	4	CCAGCACAGAATATGCAC	-	b0254	perR	-	b0253	ykfA	-
IS	332378	7	TTGGTACGGGTTATGCGA	+	b0315	yahA	+	b0316	yahB	-
IS	338121	6	ATGGCGAAGATTTTGCGT	+	b0321	yahG	+	b0323	yahI	+
IS	376784	3	TTGGCGAGCATATTGCCT	-	b0355	frmB	-	b0354	yaiL	+
IS	422554	5	GTGGCACGGGTGGTGCTT	+	b0403	malZ	+	b0404	acpH	-
IS	438671	4	CTGGCACGTTGTTTGAAG	-	b0420	dxs	-	b0419	yajO	-
IS	447073	3	CTGGTGTGCTTCCTGCAC	-	b0429	cyoD	-	b0428	cyoE	-
IS	560963	3	CGGGCATGAAAATGGCAT	+	b0532	sfmD	+	b0533	sfmH	+
IS	630475	7	ATGGCCTACATTCTGCAC	+	b0598	cstA	+	b4512	bdD	+
IS	664392	4	GTGGCTCGGGATCTGCAT	-	b0633	rlpA	-	b0632	dacA	-
IS	848772	6	TTGGTTCGTTGATTGCAG	-	b0813	rhtA	-	b0812	dps	-
IS	864620	3	CTGGTACAGCCTTTGCTG	-	b0827	moeA	-	b0826	moeB	-
IS	939767	7	CAGGCACGTCGTATGCAG	+	b0893	serS	+	b0894	dmsA	+
IS	965218	5	CTGGATTCAATATTGCAT	+	b0913	ycaI	+	b0914	msbA	+
IS	1087731	4	TTGGCATGTTATATGAAG	-	b1023	pgaB	-	b1022	pgaC	-
IS	1092850	3	TTGGTATATTAGTCGCAC	+	b1025	ycdT	+	b1026	insF	-
IS	1235541	4	ACGGAACGTTTTATGCTG	-	b1188	ycgB	-	b1187	fadR	+
IS	1488254	3	ATGGCCAAAGCCTTGCAT	-	b4493	gapC	-	b1415	aldA	+
IS	1653010	3	GTGGCCTCTTATTTGCAG	-	b1581	rspA	-	b1580	rspB	-
IS	1668933	4	TCGGCGCATTTATTGCTC	+	b1596	ynfM	+	b1597	asr	+
IS	1705784	3	TCGGCACTGCTTATGCAG	+	b1629	rsxC	+	b1630	rsxD	+
IS	1717389	3	AAGGAACAAAATCTGCAG	-	b1640	anmK	-	b1639	mliC	-
IS	1718806	6	CTGGCACGGTTGGTGCGC	-	b1642	slyA	-	b1641	slyB	+
IS	1790469	5	TTGGCACGCAAATTGATA	-	b1708	nlpC	-	b1707	ydiV	-
IS	1809360	5	GTGGTGCAGAAACTGCAC	+	b1729	ydjN	+	b1730	ydjO	-
IS	1839111	3	TTGGCTTTATTCTTGCTG	-	b1758	ynjF	-	b1757	ynjE	+
IS	1841514	5	CAGGCGTACTATTTGCAC	+	b1761	gdhA	+	b1762	ynjI	-
IS	1869785	7	TTGGCACGGTTTTTTCAA	+	b1785	yeaI	+	b1786	yeaJ	+
IS	1907113	6	ACGGTACAATACTTGCAC	+	b4536	yobH	+	b1827	kdgR	-
IS	1932081	3	ATGGCAAGCGGTTTGCCA	-	b1851	edd	-	b1850	eda	-
IS	1950918	3	CTGGTACGCAGGTTTACG	+	b1870	cmoA	+	b1871	cmoB	+
IS	1982673	3	TTGGTATGGATATTGACC	-	b1900	araG	-	b4460	araH	-
IS	2027579	5	TTGGCGCGCTGTTTGCGT	+	b1959	yedA	+	b1960	vsr	-
IS	2052040	5	TGGGCACCTATTTTGCTG	+	b1981	shiA	+	b1982	amn	+
IS	2062951	4	ATGGCGTATTTTCTGCAC	-	b1992	cobS	-	b1991	cobT	-
IS	2127997	6	TTGGCTCACTTTATGAAT	-	b2056	wcaD	-	b2055	wcaE	-
IS	2192947	3	GTGGCAAATAAAATGCAG	+	b2114	metG	+	b4499	yehH	+
IS	2269987	3	TCGGCGTAGAAATTGCTA	+	b2176	rtn	+	b2177	yejA	+
IS	2325744	4	CAGGAACGATTCGTGCAC	-	b2225	yfaP	-	b2224	atoB	+
IS	2374872	12	CTGGCGCAGATCTTGCGT	-	b2263	menH	-	b2262	menB	-
IS	2464404	4	CAGGTTCGATTCCTGCAG	+	b2348	argW	+	b2349	intS	+
IS	2486679	3	TTGGTACATCTCTTGCGG	-	b2371	yfdE	-	b2370	evgS	+
IS	2487462	6	ATGGCATGTCATTTGAAC	-	b2372	yfdV	-	b2371	yfdE	-
IS	2513904	3	TTGGCACCGGATATGCCA	-	b2395	yfeA	-	b2394	insL	+
IS	2552732	3	CAGGCTAACTTTTTGCAT	-	b2437	eutR	-	b2436	hemF	+
IS	2561975	4	TAGGCATGAGTTTTGAGT	+	b2448	yffQ	+	b2449	yffR	+
IS	2669786	3	CTGGCACCGAAAGTGCGG	+	b2541	hcaB	+	b2542	hcaD	+
IS	2770561	3	ATGGCCTGCGCAATGCAG	-	b2641	yfjV	-	b2638	yfjU	-
IS	2948012	3	ACGGTGCGCTTTTTGCGT	+	b2818	argA	+	b2819	recD	-
IS	3131458	7	ATGGCATCTTATTTGCCC	-	b2985	yghS	-	b2984	yghR	-
IS	3169798	5	ATGGCATGAATGTTGAAT	+	b3026	qseC	+	b3027	ygiZ	-
IS	3210662	6	GTGGTACAAATAATGCTG	+	b3066	dnaG	+	b3067	rpoD	+
IS	3327840	3	CTGGAACGGTAGTTGCCA	+	b3182	dacB	+	b3183	obgE	-
IS	3348112	5	CTGGCACAAGCGATGCAT	-	b3209	elbB	-	b3208	mtgA	-
IS	3396331	4	TTGGCGTGACCTTTGAAC	-	b3248	yhdE	-	b3247	rng	-
IS	3477876	3	TCGGTACATTTATTGCGG	-	b3350	kefB	-	b4551	yheV	-	P
IS	3496260	5	CTGGCACGCCTGTTGCGC	+	b3368	cysG	+	b3369	yhfL	+
IS	3573222	5	ATGGTGCGAGAGTTGCTT	+	b3434	yhgN	+	b4476	gntU	-
IS	3681811	6	CTGGCGCAGAGCCTGAAC	-	b3529	yhjK	-	b3528	dctA	-
IS	3694775	5	TTGACCCGTGATTTGCAG	+	b3536	bcsE	+	b3537	bcsF	+
IS	3728169	3	CTGGGCCGCTTTATGCAG	-	b3565	xylA	-	b3564	xylB	-
IS	3737167	3	ATGGCGGAGAAATTGCAG	+	b3571	malS	+	b3572	avtA	+
IS	3803009	3	TAGGGATGGATAATGCAT	-	b3629	waaS	-	b3628	waaB	-
IS	3847602	5	CTGGTCTGGTACTTGCTG	-	b3668	uhpB	-	b3667	uhpC	-
IS	3874178	5	ATGGCGTGGCGTTTGCTA	-	b3697	yidA	-	b3696	yidX	+
IS	3926434	3	GCGGCACCGATCTTGCCA	-	b3745	viaA	-	b3744	asnA	+
IS	3960122	5	ATGGCATGGATTATGAAT	+	b3778	rep	+	b3779	gpp	-
IS	4164135	3	CTGGCGCAGCGATTGCTC	+	b3967	murI	+	b3968	rrsB	+
IS	4254270	5	CTGGCACATGACTTGCCT	-	b4041	plsB	-	b4040	ubiA	+
IS	4329345	3	TTGGTCTGGTAATTGCCA	+	b4111	proP	+	b4703	pmrR	+
IS	4329592	4	TCGGCCTGATTTTTGCCG	+	b4111	proP	+	b4703	pmrR	+
IS	4410766	3	TAAGTACGAAAATTGCTA	+	b4185	yjfM	+	b4186	yjfC	+
IS	4603846	4	CGGGATTGCTGATTGCAG	+	b4567	yjjZ	+	b4368	leuV	-
IS	4632830	3	CTGGCACGATTTTCTCGG	-	b4396	rob	-	b4395	ytjC	+
IS	4634078	3	CTGGTCTACATGTTGCAG	+	b4398	creB	+	b4399	creC	+
IA	42487	4	TTGGCATCGGCTTTGCTG	-	b0041	fixA	+	b0040	caiT	-
IA	167076	3	CTGGCACAGCGATTGCGG	-	b0149	mrcB	+	b0148	hrpB	+
IA	196956	5	CTGGTGCAATTTGTGCTT	-	b0176	rseP	+	b0175	cdsA	+
IA	427015	3	CTGGATCAGCGTTTGCTC	-	b0408	secD	+	b0407	yajC	+
IA	463347	4	CTGGCATTATTAATGCTG	-	b0442	ybaV	+	b0441	ppiD	+
IA	518670	6	CTGGCGCAGCGTTTGCTC	+	b0494	tesA	-	b0495	ybbA	+
IA	586987	3	CTGGCTGGGTAAATGCAT	+	b0567	ybcH	-	b0568	nfrA	-
IA	589735	4	ATCGCACGCTTTTTGCTG	+	b0568	nfrA	-	b0569	nfrB	-
IA	666522	3	GCGGAATAATCTTTGCTG	+	b0635	mrdA	-	b0636	rlmH	-
IA	749689	3	GTGGCTACTGTTTTGCAT	+	b0718	ybgQ	-	b0719	ybgD	-
IA	781947	5	CGGGTATTCTTCTTGCAA	-	b0750	nadA	+	b0749	lysQ	+
IA	817381	4	ATGGCCCGCTTCTTGCGC	-	b0782	moaB	+	b0781	moaA	+
IA	825459	3	GAGGAACAGGCTTTGCAG	+	b0793	ybhS	-	b0794	ybhF	-
IA	976233	3	CTGGAACGCTTTACGCAC	-	b0924	mukB	+	b0923	mukE	+
IA	1028762	5	CGGGTACAGCGTTTGCAG	+	b0967	rlmI	-	b0968	yccX	+
IA	1058195	5	GTGGCCTGCAACTTGCTC	-	b0996	torC	+	b0995	torR	-
IA	1155636	5	ATGGCACGCTATATGCCA	-	b1099	holB	+	b1098	tmk	+
IA	1203122	4	CTGGTACATTCACTGCAT	-	b1148	ymfM	+	b1147	ymfL	+
IA	1248437	3	CTGGCGCGGCCTTTGCGG	+	b1199	dhaL	-	b1200	dhaK	-
IA	1359208	12	CAGGTACTTTTCTTGCAG	-	b1298	puuD	+	b1297	puuA	-
IA	1508228	3	TCGGCATTTTTATTGCCT	-	b1439	ydcR	+	b1438	hicB	+
IA	1601578	3	GTGGCATAAAAACTGCGT	-	b1514	lsrC	+	b1513	lsrA	+
IA	1720866	3	AAGGCGCGCGTTTTGCTG	-	b1645	ydhK	+	b1644	ydhJ	+
IA	1793519	6	TTGGCATCCCGCTTGCTA	+	b1712	ihfA	-	b1713	pheT	-
IA	2037086	4	CTGGTTCAAAATGTGCAC	-	b1970	hiuH	+	b1969	yedW	-
IA	2122472	8	CAGGCATAAAAACTGCTT	+	b2049	cpsB	-	b2050	wcaI	-
IA	2177564	6	GTGGCGTTTTTCATGCCA	-	b2098	yegT	+	b2097	fbaB	-
IA	2226703	4	CTGGCGGGTTTCATGCAT	+	b2139	mdtQ	-	b4679	yohP	+
IA	2316801	5	GCGGTACGCAAAATGCAG	+	b2218	rcsC	-	b2219	atoS	+
IA	2324252	5	GTGAATCGATTTTTGCAC	-	b2224	atoB	+	b2223	atoE	+
IA	2344571	3	CGGGCACGCGCCTTGCTC	-	b2234	nrdA	+	b2233	yfaL	-
IA	2366541	3	ATGGCACAATTTATGATG	-	b2255	arnA	+	b2254	arnC	+
IA	2371127	3	AAGGCATAGGCTTTGCTT	-	b2258	arnF	+	b4544	arnE	+
IA	2379203	4	CTGGTAGAAGTTTTGCAG	+	b2267	elaA	-	b2268	rbn	+
IA	2608110	3	ACGGCACGGTTTTTGACT	-	b2487	hyfG	+	b2486	hyfF	+
IA	2640593	5	TCGGCGCAACTTTTGCAG	+	b2516	rodZ	-	b2517	rlmN	-
IA	2733597	4	CCGGAACGGTTTTTGCCA	+	b2594	rluD	-	b2595	bamD	+
IA	2831781	3	TTGGCTCGCCTTTTGCCG	-	b2710	norV	+	b2709	norR	-
IA	2890989	4	ACGGATCGAATCGTGCAC	-	b2766	ygcN	+	b2765	queD	+
IA	3085050	3	TCGGCACGGTCAACGCCC	-	b2942	metK	+	b2940	yqgC	+
IA	3257489	7	GTGGCATGGCCTTTGCCC	+	b4471	tdcG	-	b3113	tdcF	-
IA	3363126	6	ACGGCATGATTGCTGCTC	-	b3216	yhcD	+	b3215	yhcA	+
IA	3553202	5	CCAGCAAGATTTGTGCAC	-	b3418	malT	+	b3417	malP	-
IA	3578303	3	CTGGTCCATCGTATGCAC	+	b3440	yhhX	-	b4451	ryhB	-
IA	3705355	7	ATGGTACGGGTTTTGCGC	+	b3544	dppA	-	b3545	proK	-
IA	3850975	3	TTGGTAGTAGTTTTGCGT	+	b3672	ivbL	-	b4616	istR	-
IA	3881159	3	TTGGCATTCGGCTTGCGC	+	b3702	dnaA	-	b3703	rpmH	+
IA	4028318	6	GTGGCTTCAATCTTGCTC	+	b3846	fadB	-	b3847	pepQ	+
IA	4081854	5	TCGGCATACATCTTGCGC	+	b3894	fdoG	-	b3895	fdhD	+
IA	4393369	3	CCGGCATCAATAATGCCT	-	b4167	nnr	+	b4166	queG	-
a	Class; OA = Outside of a gene in the Antisense orientation, OS = Outside of a gene in the Sense orientation, IA = Inside a gene in the Antisense orientation, IS = Inside a gene in the Sense orientation; each peak is also assigned a unique number for cross-referencing with other datasets
b	FAT = Fold Above Threshold score (indication of ChIP-seq occupancy; all values are five times higher than standard FAT scores, to facilitate the low stringency search)
c	Associated motif identified using MEME
d	Genomic orientation of associated motif
e	Overlapping gene
f	Genomic orientation of overlapping gene
g	First gene downstream of binding site, excluding the gene that the binding site is within
h	Genomic orientation of downstream gene
i	P = Promoter is Predicted in Ecocyc; C = promoter is experimentally Confirmed in Ecocyc [26]
