# Supplementary material for: Genome-Scale Mapping of Escherichia coli σ54 Reveals Widespread, Conserved Intragenic Binding
Source: PLoS Genet. 2015 Oct 1;11(10):e1005552. doi: 10.1371/journal.pgen.1005552 (PMC4591121; doi:10.1371/journal.pgen.1005552)
Supplement: S3 Table — (XLSX) [file pgen.1005552.s009.xlsx]

## Sheet: Table S3
Cho et al. (2014) [29]	Bonocora et al.
RpoN "Peaks"a	IDb	Peak Centerc
29188 - 29841
41896 - 42645
70809 - 71633	IA01	71210
83784 - 84245
234613 - 235287
237563 - 238862
257188 - 257887
347243 - 348467	OS01	347850
360693 - 361342
452937 - 453511	IA04	453263
455462 - 456136	OS02	455741
471105 - 472429	OS03	471768
485008 - 485682	IA05	485009
518064 - 518663
574566 - 575015
582627 - 583451
651164 - 651598
655299 - 656073	IS06	655861
686730 - 687929
688255 - 689254	OS04	688441
702380 - 703104	IA08	702665
732705 - 733204
770033 - 770607
784158 - 785107
797283 - 797682	IA09	797417
815765 - 816189	OS05	815921
844347 - 845221
846522 - 848171	OS06	847290
882260 - 883384	OS07	882891
892604 - 893381	OS08	892944
917708 - 918332
1006693 - 1007454
1014405 - 1015017	OS09	1014824
1018593 - 1019342
1036737 - 1037461	IS11	1037161
1063212 - 1064111
1067412 - 1067961	OA02	1067669
1072737 - 1073861	OS10	1073263
1091762 - 1092736
1119640 - 1120596
1124247 - 1124721
1145579 - 1146053
1164755 - 1165229	OS11	1165190
1196638 - 1197387
1202726 - 1203425
1210868 - 1211842
1249649 - 1250435
1255049 - 1255898
1271199 - 1272198	OS12	1271626
1308226 - 1309175	OS13	1308544
1328577 - 1329076	OS14	1328870
1337913 - 1338662
1359065 - 1359451
1365190 - 1366614	OS15	1366050
1394066 - 1394490
1402317 - 1402866
1425937 - 1426686
1444963 - 1445687
1489292 - 1489791
1508763 - 1509792
1525000 - 1525474
1527900 - 1528505
1560592 - 1561791	OS16	1561149
1652920 - 1653469
1661895 - 1662644	IS21	1662480
1678745 - 1679219	IS22	1679126
1693595 - 1694094	IA13	1693966
1718746 - 1719195
1723896 - 1724695	IA14	1724329
1790122 - 1790896
1793297 - 1793696
1830060 - 1830534	OS17	1830088
1864360 - 1865217	OS18	1864820
1869493 - 1870017
1876918 - 1877742
1906070 - 1906969
2009448 - 2010372
2025852 - 2026301
2027377 - 2027751
2031577 - 2032076
2059609 - 2060733	OS19	2060018
2064959 - 2065383
2135316 - 2135865
2287688 - 2288137
2310900 - 2311449
2318175 - 2318924
2320900 - 2321549	OS21	2321425
2370079 - 2370528	IS28	2370326
2374954 - 2375378
2379116 - 2379678
2425422 - 2426371	OS22	2425886
2531031 - 2532030	IA18	2531372
2561436 - 2561885
2562686 - 2563510
2626903 - 2627727
2640179 - 2640978
2688602 - 2690226	OS24	2689367
2783899 - 2784948
2796452 - 2797088
2802653 - 2803202	OA04	2802707
2830156 - 2830755	OS25	2830446
2835656 - 2836680	OS26	2836164
2847256 - 2849930	OS27	2848494
2912013 - 2912662	IS32	2912348
2937398 - 2937897
2959850 - 2960499	IA22	2960070
2988662 - 2989257
2992808 - 2993636
2997800 - 2998599	OS29	2998270
3003550 - 3004653	OS30	3004190
3013229 - 3014428	OS31	3014019
3028352 - 3029976	OS32	3029005
3056377 - 3056976
3078896 - 3079795
3128163 - 3128587
3143513 - 3145012	OA05	3144330
3152597 - 3153171	IA25	3152925
3210377 - 3210976
3217077 - 3217663	OS33	3217457
3264838 - 3265825
3272595 - 3273019
3330208 - 3330782	IS40	3330429
3352179 - 3352503
3416307 - 3417731	OS34	3416975
3440234 - 3440896	IA26	3440661
3453347 - 3453921
3555938 - 3556588	OS35	3556144
3561889 - 3562496
3572847 - 3573521
3579884 - 3580852
3598199 - 3599523	OS36	3598850
3650835 - 3651259
3681390 - 3681789
3683915 - 3684364
3796289 - 3797813
3798416 - 3799703
3802604 - 3803505
3850656 - 3851457	IA27	3851258
3966887 - 3967411	IS46	3966932
4055231 - 4057130	OS37	4056144
4079458 - 4080032	IS47	4079719
4131023 - 4131772	IS48	4131399
4195074 - 4195573
4198974 - 4200498	OS38	4199750
4244409 - 4244833
4248909 - 4249970
4260167 - 4261341	OS40	4260832
4266504 - 4267203
4267667 - 4268441
4280329 - 4281016
4296718 - 4298242	OS41	4297443
4328369 - 4329493
4341544 - 4342418	IS49	4342113
4436920 - 4437795	OS42	4437375
4457022 - 4457721	IS52	4457537
4465331 - 4465959
4477610 - 4478537
4487613 - 4487937
4547046 - 4547470	IS53	4547262
4560997 - 4561772	IS54	4561465
4632674 - 4633373
a	Regions of enrichment identified in Cho et al. (2014) [29]
b	Unique ID for Peak Centers identified in this study (Tables 1 + 2)
c	Peak Centers identified in this study from Tables 1 + 2
